# Supplementary material for: Potential of Artesunate in the treatment of visceral leishmaniasis in dogs naturally infected by Leishmania infantum: Efficacy evidence from a randomized field trial
Source: PLoS Negl Trop Dis. 2020 Dec 18;14(12):e0008947. doi: 10.1371/journal.pntd.0008947 (PMC7781483; doi:10.1371/journal.pntd.0008947)
Supplement: S2 Table — (XLSX) [file pntd.0008947.s003.xlsx]

## Sheet: Feuil1
Table S2. Individual clinical signs and calculation of clinical scores (SC) and percentage reduction of CS at each time-point
Dog ID	Treatment	Clinical signs and calcule of clinical scores at each time-point (CS= sum of score of clinical signs); 1 = mild, 2 = moderate, and 3 = severe.					Clinical scores over time				Percentage of reduction of clinical scores at each time-point
		Clinical signs	D+0	D+30	D+90	D+180	D+0	D+30	D+90	D+180	% of red D+0/D+30	% of red D+0/D+90	% of red D+0/D+180
13	Antimoniate of meglumine + Allopurinol	Amaigraissement+ Adenomegalia+inappetance+depilation	2+2+2+1	1+2+2+3	1+2+2+3	1+2+2+3	7	8	8	8	-14.2857	-14.2857	-14.2857
14		Amaigraissement+ inappetance	2+1	1	1	1	3	1	1	1	66.6667	66.6667	66.6667		Legends:
15		Amaigraissement+ onychogryphose+Adenomegalia+inappetance	3+1+2+2	3+2+2+2+1+2			8	12			-50					Empty cases: Lost or Mortality not related to CanL
3" Rosa		Amaigraissement+Innapetance+escarts+localized depilation+Onychogryphosis	2+3+1+3+1	1+1+1	1+1+1	1+1+1	10	3	3	3	70	70	70
5"		Amaigraissement+Innapetance+escarts+localized depilation+Onychogryphosis ulcération+Adenomegalia+ arthritis	3++3+1+3+3+2+2+3	3+3+1+3+3+2+2+3	3+3+1+3+3+2+3+3	3+3+1+3+3+2+3+3	20	20	21	21	0	-5	-5		22	Mortality not related to CanL
8''		Amaigraissement+depilation	2+1	0	0	0	3	0	0	0	100	100	100
S26 Rex		Escarts+Abattement+Hyperthermia	2+2+2	1+1	1	1	6	2	1	1	66.6667	83.3333	83.3333
S27 Laika		Escarts+Onychogryphosis+Innapetance	2+2+1+1	1+1	1+1	1+1	6	2	2	2	66.6667	66.6667	66.6667
S33		Amaigraissement+Onychogryphosis+Abattement+depilation+ulceration+annorexia+squamosis+hyperkeratosis+depilation around the eyes	2+1+1+3+2+1+2+2+1+1	1+1+2+1			16	5			68.75
S34		Amaigraissement+Onychogryphosis+ Abattement+depilation	2+2+2+2	2+1			8	3			62.5
S35		Amaigraissement+Onychogryphosis+ Abattement+depilation	2+1+2+1	0	0	0	6	0	0	0	100	100	100
S41 Rombo		Amaigraissement+Onychogryphosis+ Abattement+annorexia	2+1+3+2	1+2	1+1	1	8	3	2	1	62.5	75	87.5
S42 Jack		Amaigraissement+Onychogryphosis+ Abattement+ulceration	2+1+3+1	1+2	1+2	1	7	3	3	1	57.1429	57.1429	85.7143
S52		Abattement	3	1	0	0	3	1	0	0	66.6667	100	100
S53		Abattement+ ulceration	3+1	1	1	1	4	1	1	1	75	75	75
S54		Amaigraissement+Onychogryphosis+Abattement,ulceration	2+2+2+2	3+2+2+2			8	9			-12.5
S56		Abattement+Adenomegalia	2+1	1	1	0	3	1	1	0	66.6667	66.6667	100
S59		Amaigraissement+depilation	2+2	2+2+1+2	Mortality due to CanL	Mortality due to CanL	4	7	22	22	-75	-450	-450
S61		Amaigraissement+depilation	2+1	2+2	Mortality due to CanL	Mortality due to CanL	3	4	22	22	-33.3333	-633.333	-633.333
C4P2G2		Amaigraissement+Abattement+depilation+Adenomegalia+Escarts	2+3+2+2+2	1+1	1+1	1	11	2	2	1	81.8182	81.8182	90.9091
A11 N12		Amaigraissement+Onychogryphosis+ Abattement+depilation+Adenomegalia+Escarts	2+1+2+1+2+1	2+1+3+1+2+2	Mortality due to CanL	Mortality due to CanL	9	11	22	22	-22.2222	-144.444	-144.444
A4		Amaigraissement+Onychogryphosis+ Abattement+depilation+Adenomegalia+Escarts	2+1+2+1+2+2	2+1+3+1+2+3	Mortality due to CanL	Mortality due to CanL	10	12	22	22	-20	-120	-120
A13		Abattement+innapetence+Adenomegalia	2++2+1	1	1	1	5	1	1	1	80	80	80
A N6		Abattement+innapetence+Adenomegalia+depilation	2+1+3+2	2+1	2	2	8	3	2	2	62.5	75	75
A N7		Abattement+innapetence+depilation+arthritis	2+2+1+2	2+2+1+1	1	1+1	7	6	1	2	14.2857	85.7143	71.4286
C1G2P4		Abattement+innapetence+depilation+splenomegalia+Hyperthermia+Onychogryphosis	2+2+2+2+2+1	2+1	2+1	1	11	3	3	1	72.7273	72.7273	90.9091
10	Artesunate	Abattement+conjonctivite+neurological desorders+amaigraissement	1+2+1+1	1	1	1	5	1	1	1	80	80	80
44 Abdo		Amaigraissement+Abattement+congenctivitis+Inappetance	2+2+2+2	2	1	1	8	2	1	1	75	87.5	87.5
58		Amaigraisssment+depilation+ulcération+	3+2+1	2+1	1+1	0	6	3	2	0	50	66.6667	100
63 Noir		Amaigraisssment+depilation+furfures+larmoiment	1+2+2+1	1	1	1+1	6	1	1	2	83.3333	83.3333	66.6667
S2		Ulcération+localized depilation	2+1	1	1	1	3	1	1	1	66.6667	66.6667	66.6667
S7 rex		Abattement+Ulcération+depilation+larmoiment+onychoriffose+Depilation around the eyes+	2+1+2+1+1+1	2+1+2+1+2+2	Mortality due to CanL	Mortality due to CanL	8	10	22	22	-25	-175	-175
S8		Abattement+amaigraissement+Innapetance+depilation+	1+1+2+1	1	1	1	5	1	1	1	80	80	80
S14		Amaigraissement+Onychogryphosis+Abattement	2+2+1+1	1	1	1	6	1	1	1	83.3333	83.3333	83.3333
S31		ulceration+amaigraissement+Hyperthermia	2+2+2	3+2+2+2	Mortality due to CanL	Mortality due to CanL	6	9	22	22	-50	-266.667	-266.667
S50		Abattement+conjonctivitis+neurological desorders+amaigraissement	2+1+2+3	1+2+1	2+2+2+2	2+2+2+3	8	4	8	9	50	0	-12.5
S17'		Amaigraissement+Abattement	1+2	1	0	0	3	1	0	0	66.6667	100	100
T3		Ulceration+Depilation around the eyes+amaigraissement+splenomegalia+Onychogryphosis+larmoiment+neurological desorders.	2+2+2+2+2+1				11
T11 C2P1G1		Amaigraissement+Abattement+Innapetance+depilation+Adenomegalia	1+3+3+1+2	2+1	0	0	10	3	0	0	70	100	100
A14 N14		Amaigraissement+depilation+Adenomegalia	2+1+2	1	1	1	5	1	1	1	80	80	80
A8 N8		Amaigraissement+Innapetance+Depilation around the eyes+Adenomegalia+hyperkeratosis	2+2+1+2+1	1+1	0	0	8	2	0	0	75	100	100
A9 N9 Roui		Amaigraissement+Innapetance+Depilation around the eyes+Adenomegalia+hyperkeratosis+Onychogryphosis	2+2+1+2+1+1	2+2+1+2+2+2	2+2+1+2+2+3	2+2+1+2+2+3	9	11	12	12	-22.2222	-33.3333	-33.3333
